# Supplementary material
Source: PubMed Central journal article supplement (PMC9363152)
Supplement: NIHMS1828057-supplement-Supplemental.pdf [file NIHMS1828057-supplement-Supplemental.pdf]

1 **Supplemental Tables**

2

3 **eTable 1: Novel Therapies in Clinical Trials in Advanced Pancreatic Cancer**

4 **eTable 2: Treatment Modalities for Pancreatic Cancer**

5 **eTable 3: Class, Adverse Effects, and Mechanism of Action of Systemic Agents**

6

7

8

9

10

11

12

13

14

15

16

17

18

19

20

21

22

| Clinical Trial ID | Category              | Mechanism of action                               | Study agent(s)          | Setting                                                                      | Sponsor                      |
|-------------------|-----------------------|---------------------------------------------------|-------------------------|------------------------------------------------------------------------------|------------------------------|
| NCT04666740       | Gene targeting        | PARPi in combination with PD-1 inhibition         | Olaparib, pembrolizumab | Metastatic PDAC with HRD or exceptional response without HRD in maintenance. | MSK                          |
| NCT03604445       |                       | WNT pathway inhibition                            | BI 905677               | Advanced cancers with <i>RNF43</i> mutations. Single agent                   | Boehringer Ingelheim         |
| NCT03600883       |                       | <i>KRAS</i> inhibition                            | Sotorasib (AMG 510)     | Advanced cancers with <i>KRAS</i> G12C mutation. Single or combination.      | Amgen                        |
| NCT02568267       |                       | <i>TRK</i> inhibition                             | Entrectinib             | Advanced cancers with <i>TRK</i> fusion. Single agent.                       | Hoffmann-La Roche            |
| NCT02912949       |                       | <i>NRG-1</i> inhibition by bispecific antibody    | Zenocutuzumab           | Group G: advanced PDAC with <i>NRG1</i> fusion. Single agent.                | Merus N.V.                   |
| NCT02227940       |                       | <i>ALK</i> inhibition                             | Ceritinib               | Advanced PDAC. GN or G or cisplatin combination.                             | RPCI                         |
| NCT02907099       | Immune TME modulation | CXCR4 antagonist                                  | Motixafortide (BL-8040) | Advanced PDAC. Combination with PD-1 inhibitor.                              | MD Anderson                  |
| NCT04060342       |                       | Myeloid cell recruitment inhibition               | GB1275                  | Advanced PDAC. Combination with PD-1 inhibitor and GN.                       | Gossamerbio                  |
| NCT03214250       |                       | CD40 agonist                                      | Sotigalimab             | Advanced PDAC. Combination with PD-1 inhibitor and GN.                       | PICI                         |
| NCT03006302       |                       | IDO1 inhibitor                                    | Epacadostat             | Advanced PDAC. Combination with pembrolizumab, CRS-207 +/- C/GVAX.           | Johns Hopkins                |
| NCT04262388       |                       | Adenosine antagonist by A2AR blockade             | Oleclumab               | Advanced PDAC. Combination with durvalumab.                                  | Medimmune                    |
| NCT04104672       |                       | Adenosine antagonist by CD73 inhibition           | AB680                   | Advanced PDAC. Combination with GN, AB680, AB122.                            | Arcus                        |
| NCT03766295       |                       | Mast cell inhibition                              | Masitinib               | Advanced PDAC, Combination with G with or without masitinib.                 | Ab Science                   |
| NCT03504423       | Metabolism            | Targeting cancer metabolism                       | Devimistat (CPI-613)    | Metastatic PDAC. Combination with mFOLFIRINOX with or without CPI-613        | Rafael                       |
| NCT03435250       |                       | Metabolic synthetic lethality by MAT2A inhibition | AG-270                  | Advanced PDAC with <i>CDKN2A</i> or MTAP deletion with GN combination        | Agios                        |
| NCT04292743       |                       | Targeting cancer amino acid metabolism            | Eryaspase               | Advanced PDAC in combination with mFOLFIRINOX                                | Erytech                      |
| NCT03816163       | Protein tropism       | ADCC and CDC targeting Claudin 18.2               | Zolbetuximab            | Metastatic PDAC. GN with or without zolbetuximab                             | Astellas                     |
| NCT03086369       |                       | Targeting PDGFR-a to inhibit stem cell growth     | Olaratumumab            | Metastatic PDAC. G with or without olaratumumab                              | Lilly                        |
| NCT03323944       |                       | CAR-T against mesothelin                          | CAR-T                   | Advanced PDAC. Single-agent in second-line or above.                         | University of Pennsylvania   |
| NCT03269526       |                       | Bispecific Ab engaging armed T cell on EGFR.      | BATs                    | Advanced PDAC. Single-agent in second-line or above.                         | MSK - University of Virginia |

Abbreviations: PARPi, poly-ADP ribose polymerase inhibitor; PD-1, programmed death-1; MAT2A, methionine adenosyltransferase 2A; ADCC, antibody-dependent cytotoxicity; CDC, complement-dependent cytotoxicity; PDGFR, platelet-derived growth factor receptor; CAR-T, chimeric antigen receptor-T; B220, anti-CD3 x anti-EGFR-bispecific Antibody Armed Activated T-Cells; EGFR, epidermal growth factor receptor; CXCR4, CXC- chemokine receptor type 4; IDO1, indoleamine 2,3-dioxygenase 1; A2AR, adenosine 2 A receptor; HRD, homologous recombination deficiency; GN, gemcitabine; nab-paclitaxel; TME, tumor microenvironment; G, gemcitabine; CRS-207, attenuated listeria bacteria; C/GVAX, cyclophosphamide/GVAX vaccine; RPCI, Rosewell Park Cancer Institute; PICI, Parker Institute for Cancer Immunotherapy; MSK Memorial Sloan Kettering

27 **eTable 2: Different Treatment Modalities Available for Pancreatic Cancer**

28

| Surgery                                                                                                      | Radiation                                                                            | Systemic therapy                                                                                                                                                                                                                                                                                    | Optimal Supportive Care                                                                                                                                                                                                                                                                                                                        |
|--------------------------------------------------------------------------------------------------------------|--------------------------------------------------------------------------------------|-----------------------------------------------------------------------------------------------------------------------------------------------------------------------------------------------------------------------------------------------------------------------------------------------------|------------------------------------------------------------------------------------------------------------------------------------------------------------------------------------------------------------------------------------------------------------------------------------------------------------------------------------------------|
| Pancreaticoduodenectomy (Whipple)<br><br>Distal pancreatectomy and splenectomy<br><br>Central pancreatectomy | Intensity-modulated (IMRT)<br><br>Stereotactic (SBRT)<br><br>Ablative dose radiation | (modified) FOLFIRINOX<br>Gemcitabine, nab-paclitaxel<br>5-FU/nano-liposomal irinotecan<br>Single-agent gemcitabine or capecitabine<br><br>Olaparib maintenance in germline BRCA1/2<br><br>Pembrolizumab in dMMR (mismatch repair deficiency) or TMB (tumor mutation burden) > 10 mutations/megabase | Exocrine pancreatic insufficiency:<br>pancreas enzyme supplementation<br>Nutritional support<br>Diabetes management<br>Management of jaundice:<br>endoscopic biliary stent placement<br>Management of duodenal obstruction: surgical bypass or enteral stent placement<br>Treatment of thromboembolic events<br>Psychosocial care/ counselling |
| Biospecimen and therapeutic clinical trials                                                                  |                                                                                      |                                                                                                                                                                                                                                                                                                     |                                                                                                                                                                                                                                                                                                                                                |

29  
30  
31  
32  
33  
34  
35  
36  
37  
38  
39  
40

41

42

**eTable 3: Class, Adverse Effects, and Mechanism of Action of Systemic Agents**

| <b>Agent</b>                    | <b>Route</b> | <b>Class</b>                         | <b>Mechanism of action</b>                                                                                 | <b>Specific adverse effects</b>                                          | <b>Common adverse effects</b>                                                                                           |
|---------------------------------|--------------|--------------------------------------|------------------------------------------------------------------------------------------------------------|--------------------------------------------------------------------------|-------------------------------------------------------------------------------------------------------------------------|
| <b>Gemcitabine</b>              | Intravenous  | Antimetabolite,<br>Pyrimidine analog | Inhibits DNA synthesis by blocking deoxycytidine triphosphates (dCTP) incorporation                        | Edema, proteinuria, hematuria, hepatic dysfunction, dyspnea              | fatigue, fever, infection, anemia, leukopenia, thrombocytopenia, nausea, abdominal pain, diarrhea electrolyte imbalance |
| <b>Capecitabine</b>             | Oral         | Antimetabolite,<br>Pyrimidine analog | Prodrug of 5-FU, Inhibits DNA synthesis by thymidylate synthase inhibition                                 | Mucositis, angina pectoris, vasospasm, palmar-plantar erythrodysesthesia |                                                                                                                         |
| <b>5-Fluorouracil</b>           | Intravenous  | Antimetabolite,<br>Pyrimidine analog | Inhibits DNA synthesis by thymidylate synthase inhibition                                                  | Mucositis, angina pectoris, vasospasm, palmar-plantar erythrodysesthesia |                                                                                                                         |
| <b>Irinotecan</b>               | Intravenous  | Topoisomerase I inhibitor            | Active metabolite SN-38 binds to the topoisomerase I and interferes with relieving torsional strain in DNA | Cholinergic symptoms (flushing, tearing, cramps, palpitation)            |                                                                                                                         |
| <b>Oxaliplatin</b>              | Intravenous  | Alkylator platinum                   | Creates inter-strand DNA crosslinks and inhibit DNA replication and transcription                          | Allergic reactions, neuropathy, hepatic dysfunction.                     |                                                                                                                         |
| <b>Albumin-bound paclitaxel</b> | Intravenous  | Taxane                               | Stabilizes microtubules and prevents depolymerization necessary for mitosis                                | Alopecia, edema, hepatic dysfunction, neuropathy                         |                                                                                                                         |
| <b>Olaparib</b>                 | Oral         | PARP inhibitor                       | Inhibits BER accumulating single-strand DNA breaks requiring homologous repair                             | Fatigue, abdominal pain, respiratory tract infection                     |                                                                                                                         |

43

44 PARPi, (poly-ADP (adenosine diphosphate)–ribose polymerase) inhibitor; BER, base-excision repair
